# Supplementary material
Source: Springer Nature journal article supplement (https://www.springermedizin.de/resource/supplementary/12876_2010_473_MOESM6_ESM.pdf/9437086)

**A**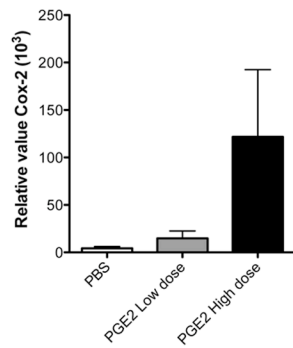**B**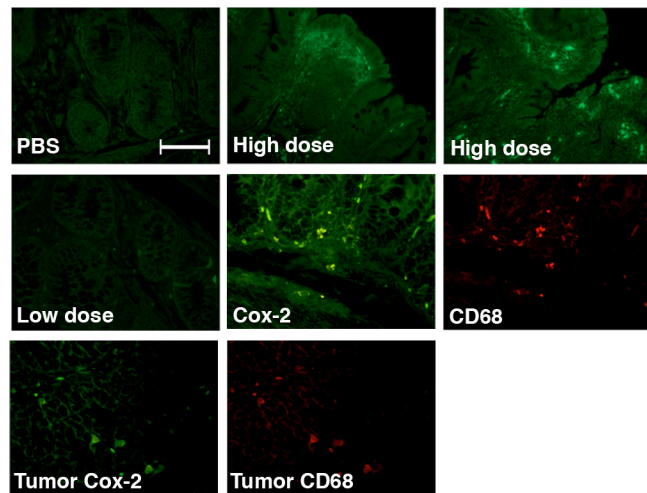**C**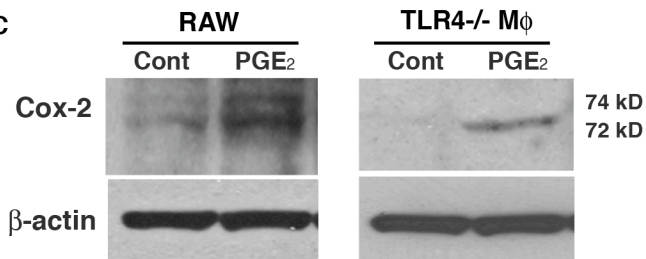

Supplement: MOESM6 [file 9437086]
